# Supplementary material for: Impact of retinoic acid exposure on midfacial shape variation and manifestation of holoprosencephaly in Twsg1 mutant mice
Source: PubMed Central journal article supplement (PMC4314779; doi:10.1242/dmm.018275), 2014-12-02
Supplement: supp_8.2.139_DMM018275.pdf [file supp_8.2.139_DMM018275.pdf]

**Supplemental Table 1. Primers used in qPCR**

| <b>Gene</b>      | <b>Forward 5' to 3'</b> | <b>Reverse 5' to 3'</b> |
|------------------|-------------------------|-------------------------|
| <i>Bmp2</i>      | tggaagtggcccatttagag    | tgacgcttttctcgtttgtg    |
| <i>Crbp1</i>     | atccgcacgctgagcacttttc  | cactggagtttgtcaccatccc  |
| <i>Cyp26a1</i>   | tccaacctgcacgattcctc    | agccactgctccagacaactg   |
| <i>Gapdh</i>     | tgaccaccaactgcttag      | gatgcagggatgatgttc      |
| <i>Hoxa1</i>     | ccaaaacagggaaagtggga    | gcgctcgtgtaaggtacttgt   |
| <i>Hoxb1</i>     | gctccaacaaaactcggggta   | cgacggatgaaaatagcttcca  |
| <i>Msx1</i>      | ccaggtgaagatctggttcc    | caggaaaagagaggccgaag    |
| <i>Msx2</i>      | cctcaggaaacacaagacca    | agttgataggaagggcaga     |
| <i>Rara</i>      | ctgtaagggcttcttccg      | agtcttaatgatgcactt      |
| <i>Rarb</i>      | tggatgttctgtcagtgagtccc | cgatggattgagcagtatgccg  |
| <i>Trp53inp1</i> | aagtgggtcccagaatggaagc  | ggcgaaaactcttgggttgt    |
